# Supplementary material for: Synthesis of pH-responsive hydrogel thin films grafted on PCL substrates for protein delivery
Source: Royal Society of Chemistry journal article supplement (doi:10.1039/c5tb01149c), 2015-01-01
Supplement: c5tb01149c1.pdf [file c5tb01149c1.pdf]

# Journal of Materials Chemistry B

PAPER

Electronic Supplementary Information for:

## Synthesis of pH-responsive hydrogel thin film grafted on PCL substrate for protein delivery

Lihua Zhang,<sup>a,b</sup> Yuhong Ma,<sup>c</sup> Changwen Zhao,<sup>a,b,\*</sup> Xing Zhu,<sup>a,b</sup> Ruichao Chen<sup>a,b</sup> and Wantai Yang<sup>a,b,\*</sup>

### Experimental

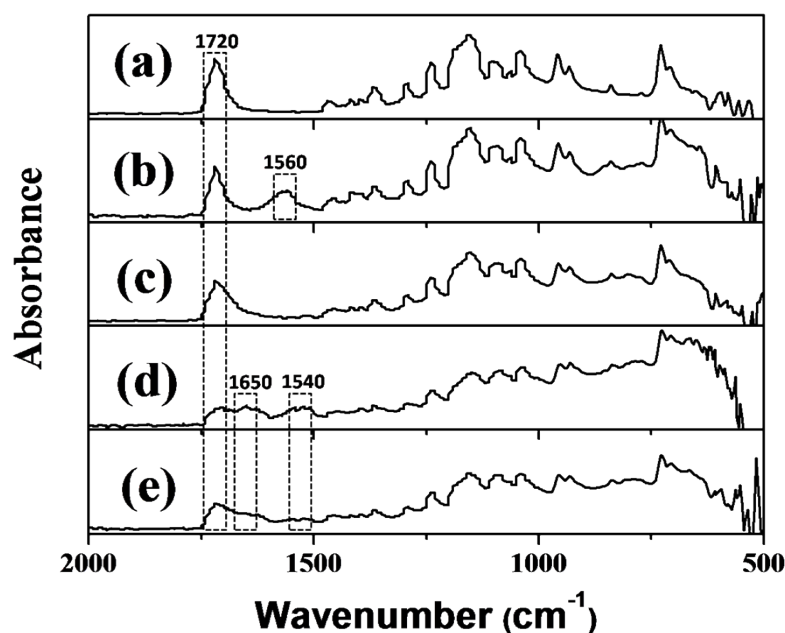

**Figure S1.** ATR/FTIR spectra of the pristine PCL (a), PCL-*g*-P(PEGDA/AA) (PEGDA:AA = 5%:25%) after treated by pH 7.4 buffer solution (b), PCL-*g*-P(PEGDA/AA) after treated by pH 2.0 buffer solution (c), PCL-*g*-P(PEGDA/AA)/BSA (d) and PCL-*g*-P(PEGDA/AA)/lysozyme (e).
